# Supplementary material for: Molecularly imprinted polymers on CdS quantum dots for sensitive determination of cefixime after its preconcentration by magnetic graphene oxide
Source: Royal Society of Chemistry journal article supplement (doi:10.1039/c7nj00834a), 2017-01-01
Supplement: c7nj00834a1.pdf [file c7nj00834a1.pdf]

## Supporting Information

### **Molecularly imprinted polymers on CdS quantum dots for sensitive determination of cefixime after its preconcentration by magnetic graphene oxide**

*Habibeh Eskandari*<sup>a</sup>, *Maliheh Amirzehni*<sup>b,\*</sup>, *Hamideh Asadalazadeh*<sup>a</sup>, and *parvin Alizadeh Eslami*<sup>b</sup>

---

<sup>a.</sup> *Department of Chemistry, Kerman Branch, Islamic Azad University, Kerman, Iran.*

<sup>b.</sup> *Department of Chemistry, Tabriz Branch, Islamic Azad University, Tabriz, Iran. Tel: +989143110806; Fax: +984133333458; Email: Maliheamirzehni@iaut.ac.ir.*

**Table S1** Comparison between the developed method and some previously reported methods for cefixime determination

| Method                     | sample                           | Linear range<br>( $\mu\text{g mL}^{-1}$ ) | Detection<br>limit<br>( $\text{ng mL}^{-1}$ ) | Ref |
|----------------------------|----------------------------------|-------------------------------------------|-----------------------------------------------|-----|
| Tb sensitized fluorescence | Pharmaceutical samples           | 2.22-13.6                                 | 170                                           | 1   |
| Voltammetric               | Tablets                          | 0.05-25                                   | 4                                             | 2   |
| HPLC                       | Human plasma                     | 0.004-5                                   | 1                                             | 3   |
| spectrophotometry          | Pharmaceutical samples           | 2.5–35                                    | 175                                           | 4   |
| Spectrofluorometric        | Pharmaceutical samples           | 60-72400                                  | $28 \times 10^3$                              | 5   |
| Spectrofluorometric        | Pharmaceutical samples           | 2–40                                      | $1.3 \times 10^3$                             | 6   |
| Developed work             | Pharmaceutical and urine samples | 0.001-0.7                                 | 0.54                                          | -   |

1. L. I. Bebawy, K. El Kelani, L. A. Fattah, *J. Pharm. Biomed. Anal.*, 2003, **32**, 1219–1225.
2. R. Jain, V. K. Gupta, N. Jadon, K. Radhapyari, *Anal Biochem.*, 2010, **407**, 79–88.
3. A. Khan, Z. Iqbal, M. I. Khan, K. Javed, L. Ahmad, Y. Shah, *J. Chromatogr. B*, 2011, **879**, 2423–2429.
4. S. N. H. Azmi, , B. Iqbal, N. S. H. Al-Humaimi, I. R. S. Al-Salmani, N. A. S. Al-Ghafri, N. Rahman, *J. Pharm. Anal.*, 2013, **3**, 248–256.
5. B. Nausheen, Al-W. A. Abdullah, W. S. Mohammad, O. Zeid Al, J. Muhammad, and H. Sajjad, *Sens. Lett.*, 2010, **8**, 280-284.
6. J. Shah, M. Rasul Jan, Tasmia, M. Yousaf, *J. Appl. Spectrosc.*, 2016, **83**, 248–253.

**Table S2** Interfering effects of different species on the determination of 1 mg L<sup>-1</sup> cefixime (in optimum condition)

| <b>Coexisting substance</b>                                                                                              | <b>Tolerance limit (interference to analyte ratio)</b> |
|--------------------------------------------------------------------------------------------------------------------------|--------------------------------------------------------|
| Na <sup>+</sup> , K <sup>+</sup> , Cl <sup>-</sup>                                                                       | 3500                                                   |
| Ca <sup>2+</sup> , Al <sup>3+</sup> , Oxalate                                                                            | 1500                                                   |
| Zn <sup>2+</sup> , Fe <sup>2+</sup> , Mn <sup>2+</sup> , PO <sub>4</sub> <sup>3-</sup> , HCO <sub>3</sub> <sup>-</sup> , | 500                                                    |
| CH <sub>3</sub> COO <sup>-</sup> , SO <sub>4</sub> <sup>2-</sup> , NO <sub>3</sub> <sup>-</sup>                          |                                                        |
| Cu <sup>2+</sup> , Mg <sup>2+</sup> , CO <sub>3</sub> <sup>2-</sup> , Urea                                               | 250                                                    |
| Fe <sup>3+</sup> , Ni <sup>2+</sup> , Cr <sup>3+</sup> , Glucose, Uric Acid                                              | 150                                                    |
| Ascorbic acid, Citrate, Glutathione                                                                                      | 100                                                    |
| I <sup>-</sup> , Pb <sup>2+</sup> , Cd <sup>2+</sup>                                                                     | 50                                                     |
| Cysteine , Hg <sup>2+</sup>                                                                                              | 25                                                     |

**Table S3** Results of cefixime determination in the real samples by established system

| Sample            | Add  | Found <sup>a</sup> | Recovery %<br>± RSD | t-statistic <sup>b</sup> |
|-------------------|------|--------------------|---------------------|--------------------------|
| Tablet (200 mg)   | 0    | 192.77±1.72        | -                   | -                        |
|                   | 50   | 48.04±1.68         | 96.08±3.50          | 1.98                     |
|                   | 100  | 98.72±1.80         | 98.72±1.83          | 1.00                     |
| Suspension (5 mg) | 0    | 4.94±0.03          | -                   | -                        |
|                   | 2.0  | 2.02±0.01          | 100.91±0.73         | 3.40                     |
|                   | 5.0  | 5.01±0.02          | 100.29±0.40         | 0.85                     |
| Urine             | 0    | ND                 | -                   | -                        |
|                   | 0.50 | 0.483±0.008        | 96.60±1.53          | 3.01                     |
|                   | 1.0  | 0.976±0.006        | 97.63±0.58          | 2.31                     |

<sup>a</sup> Mean of three determinations ± standard deviation, <sup>b</sup> t-critical=3.18 for n=3 and P=0.05

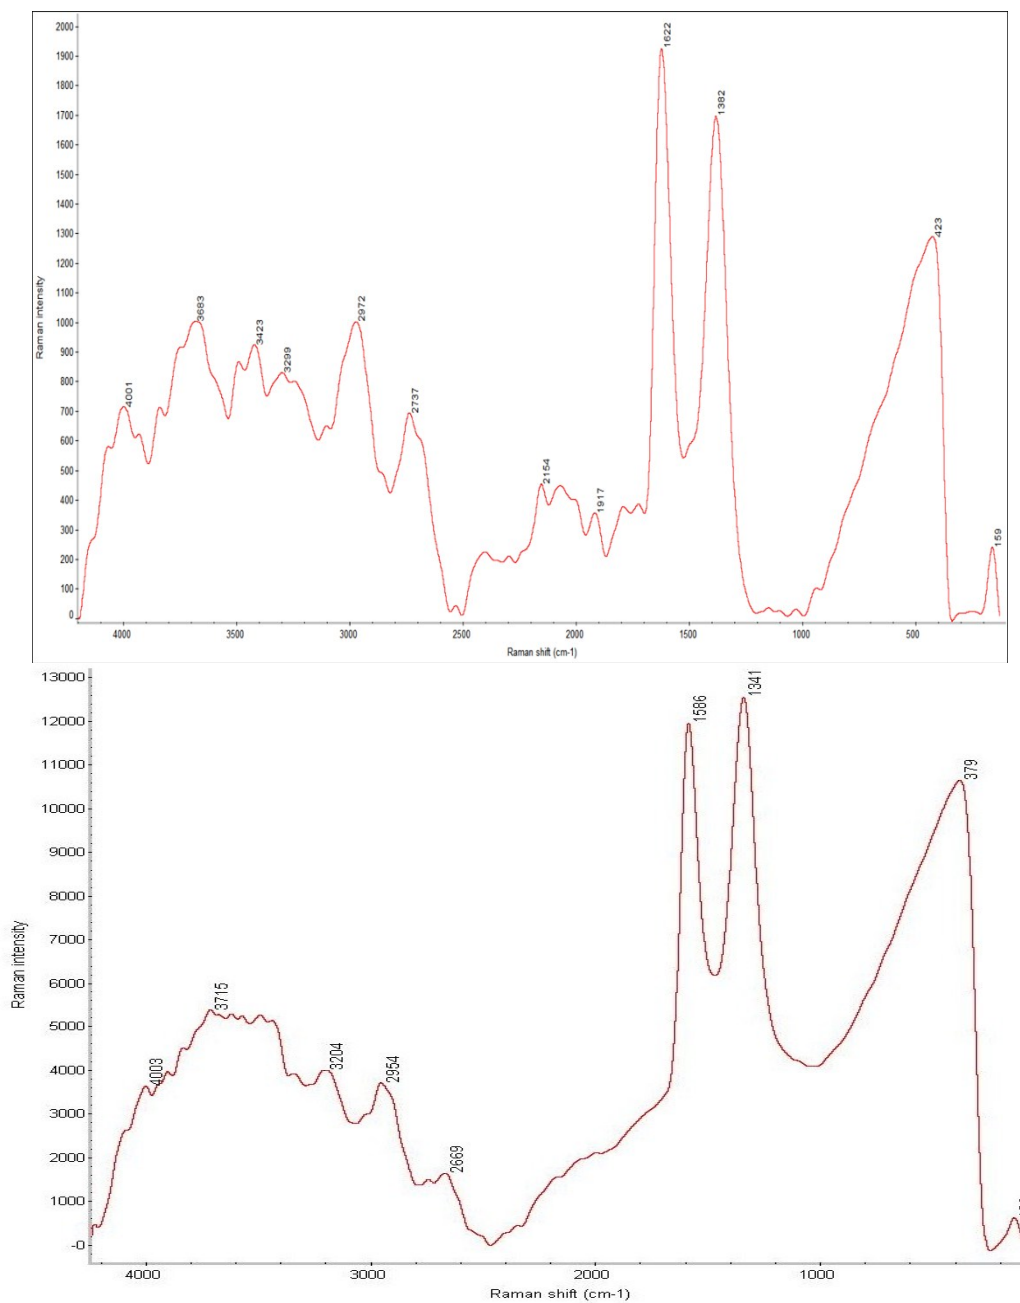

**Fig. S1 a)** Raman spectra for GO (upper) and magnetic modified GO (under)

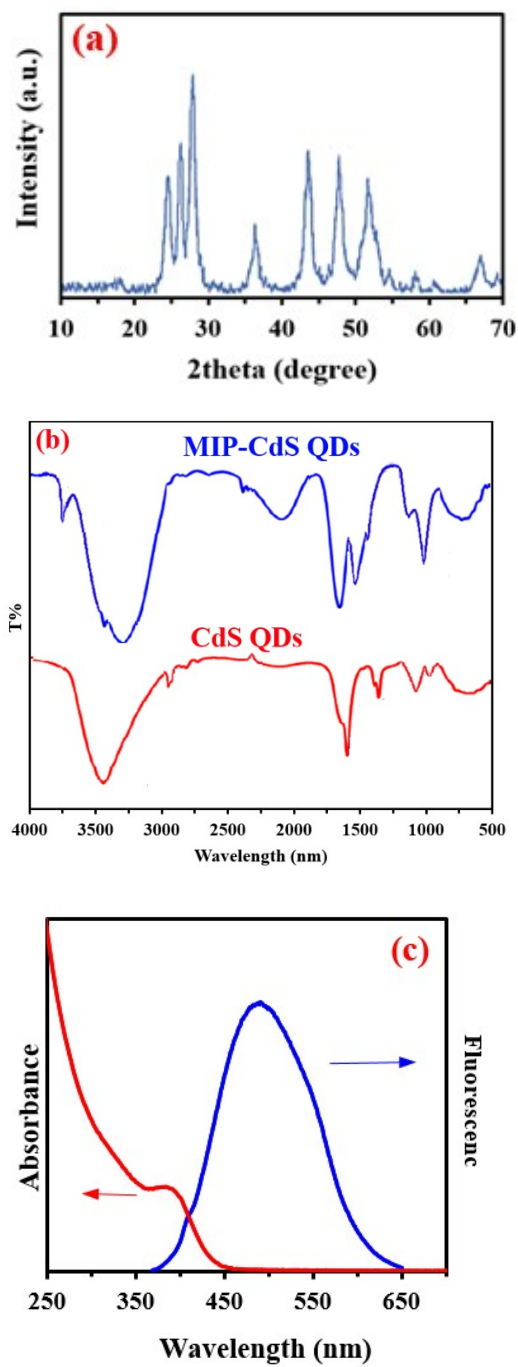

**Fig. S2** a) XRD pattern for CdS QDs, b) FTIR for CdS QDs and MIP-CdS QDs and c) adsorption and fluorescence spectra for MIP-CdS QDs

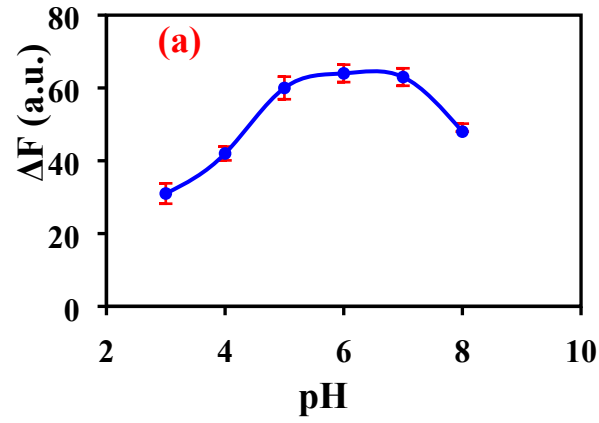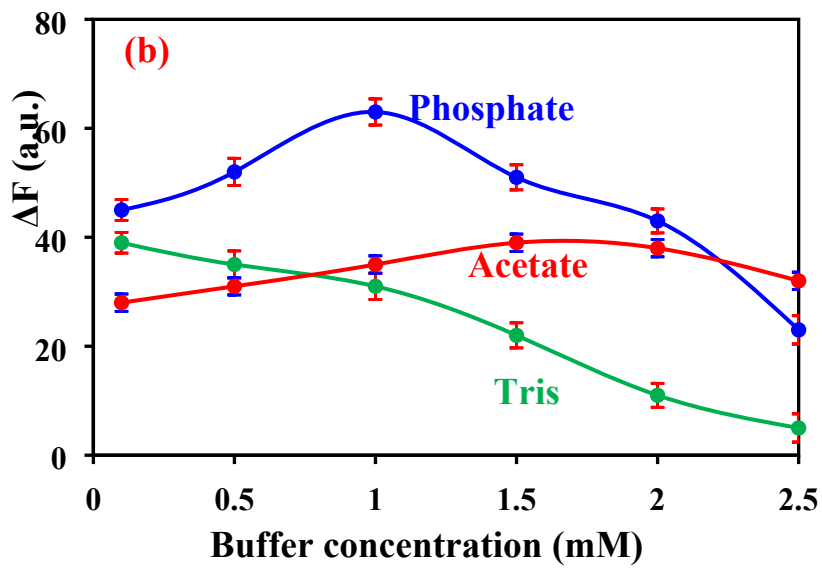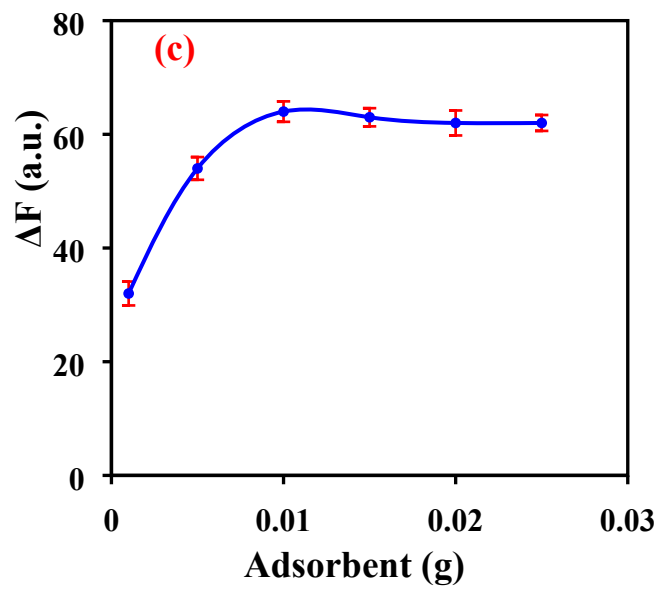

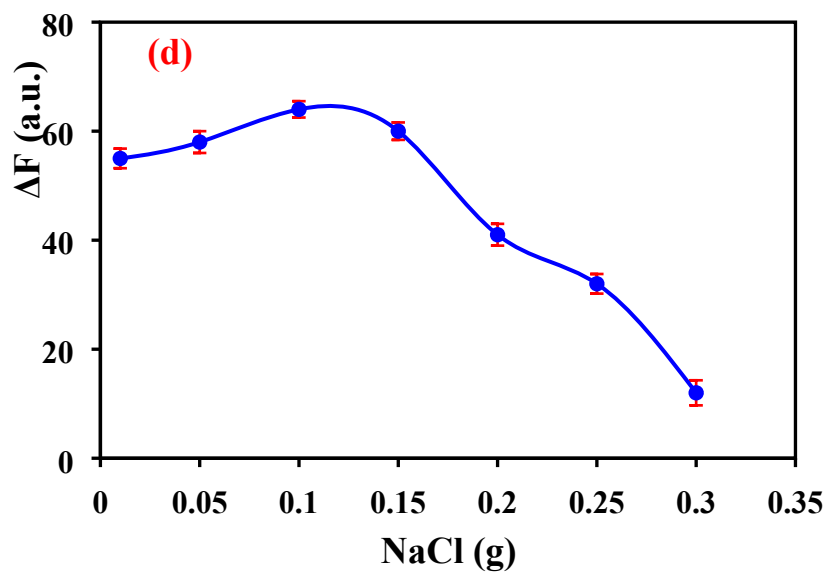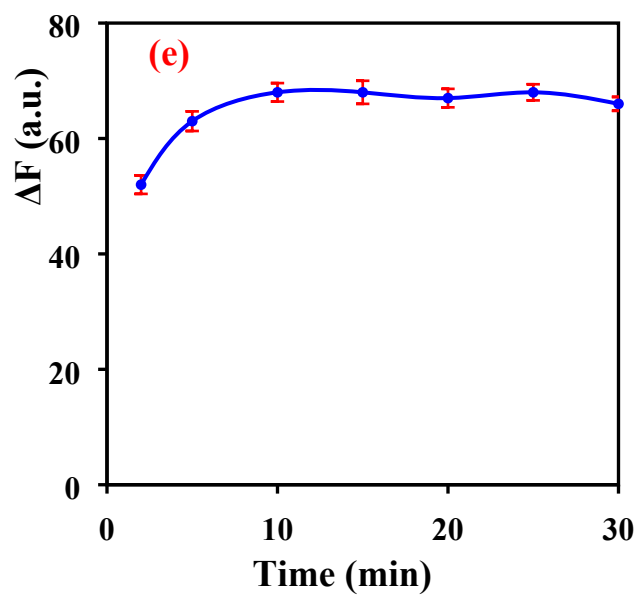

Fig. S3 Optimization curves for extraction step



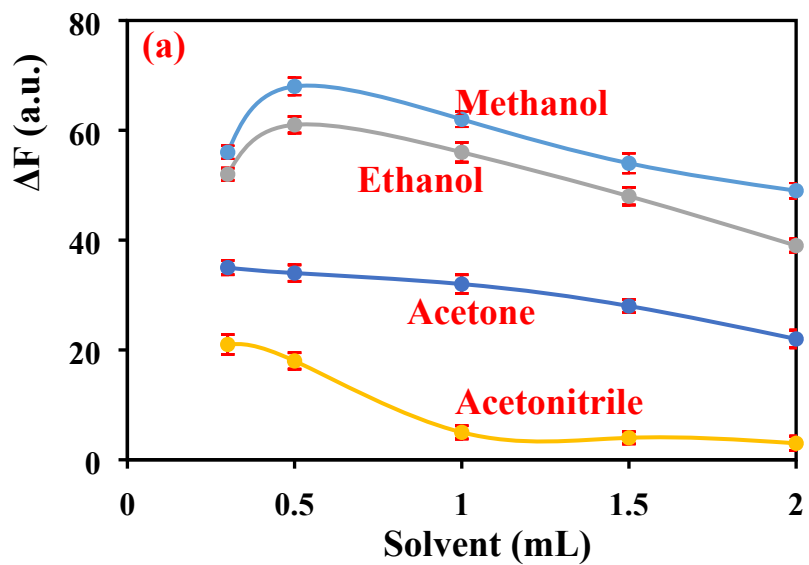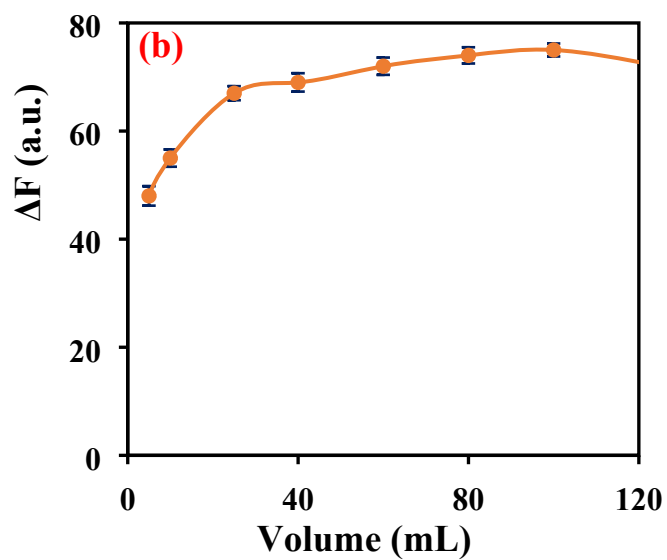

Fig. S4 Optimization curves for extraction step

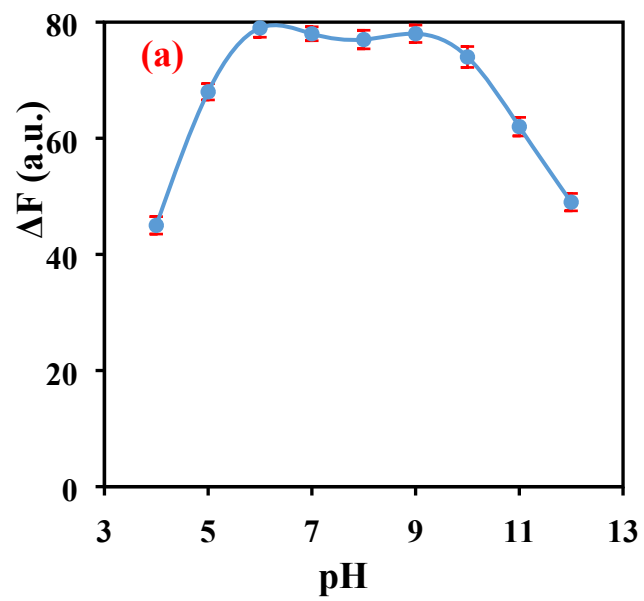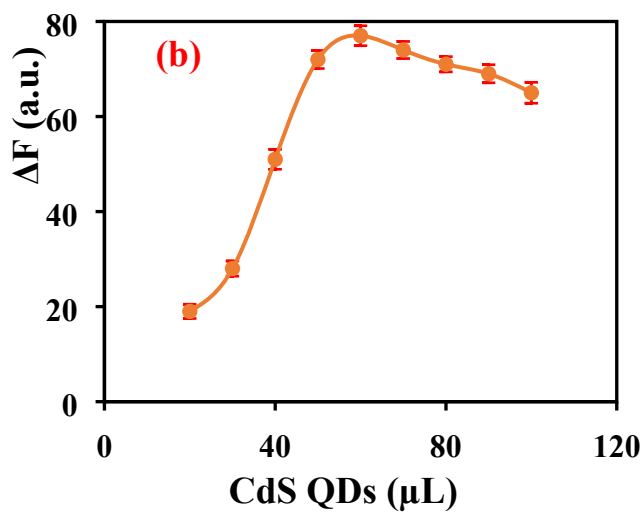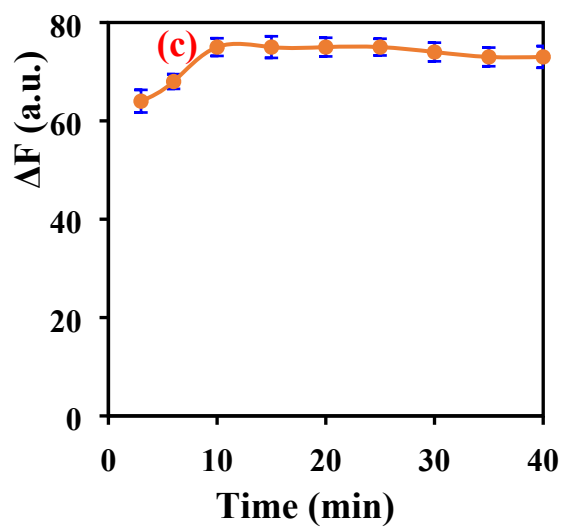

Fig. S5 Optimization curves for fluorescence detection step

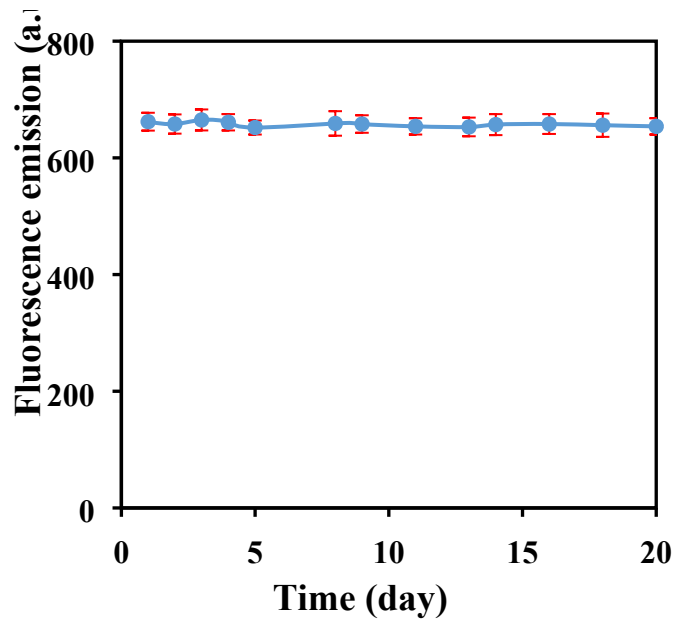

**Fig. S6** Fluorescence emission of MIP-CdS QDs in successive control during different days

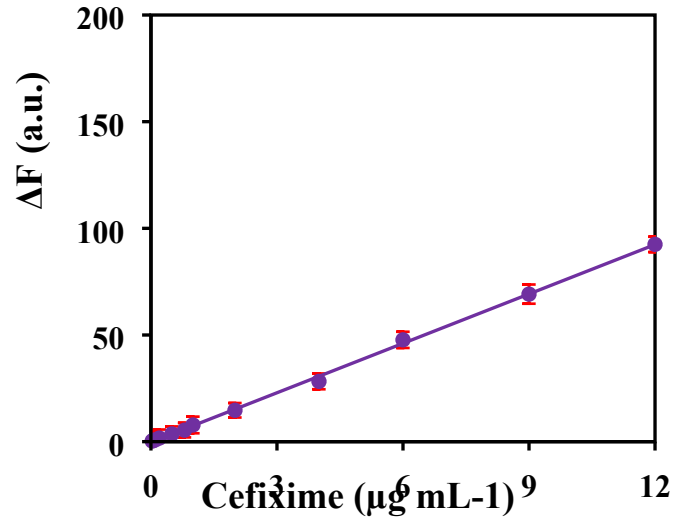

**Fig. S7** Calibration graph for the determination of cefixime by MIP-CdS QDs system without any preconcentration procedure

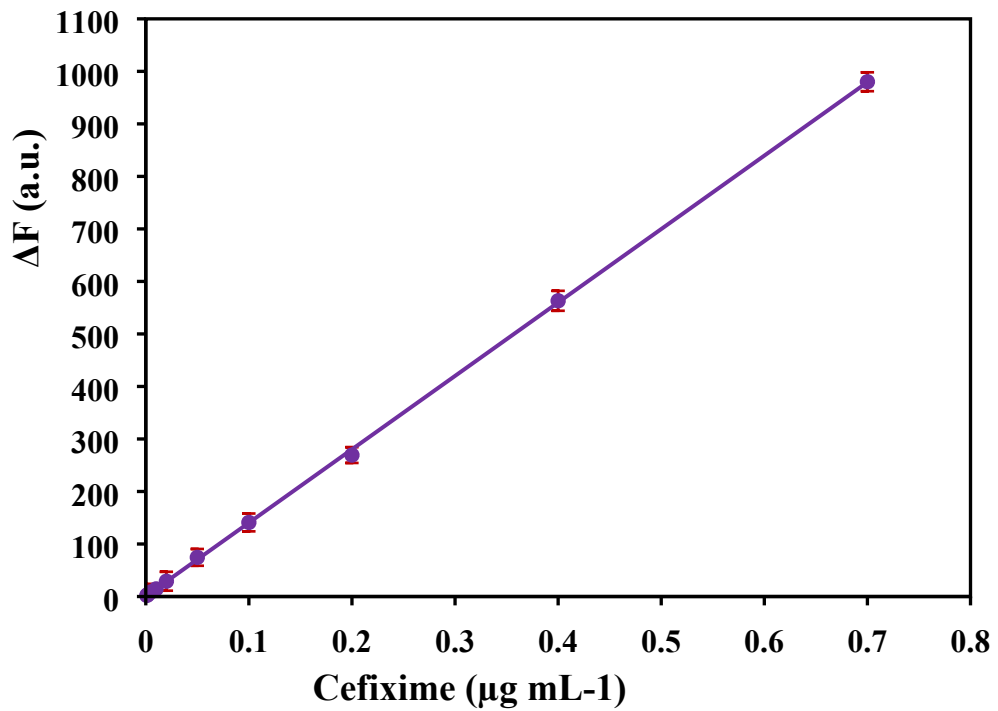

**Fig. S8** Calibration graph for the determination of cefixime by MIP-CdS QDs system after its preconcentration by  $\text{Fe}_3\text{O}_4@\text{SiO}_2\text{-GO}$ .
